# Supplementary material for: Oxygen-enriched hierarchical porous carbon derived from biowaste sunflower heads for high-performance supercapacitors
Source: Royal Society of Chemistry journal article supplement (doi:10.1039/c5ra24401c), 2015-01-01
Supplement: c5ra24401c1.pdf [file c5ra24401c1.pdf]

Electronic Supplementary Information (ESI) available:

## Supporting information

### Oxygen-enriched hierarchical porous carbon derived from biowaste sunflower head for high-performance supercapacitors

Di Ma, Guang Wu, Jiafeng Wan,\* Fangwei Ma,\* Weidan Geng and Shijiao Songhijiao.

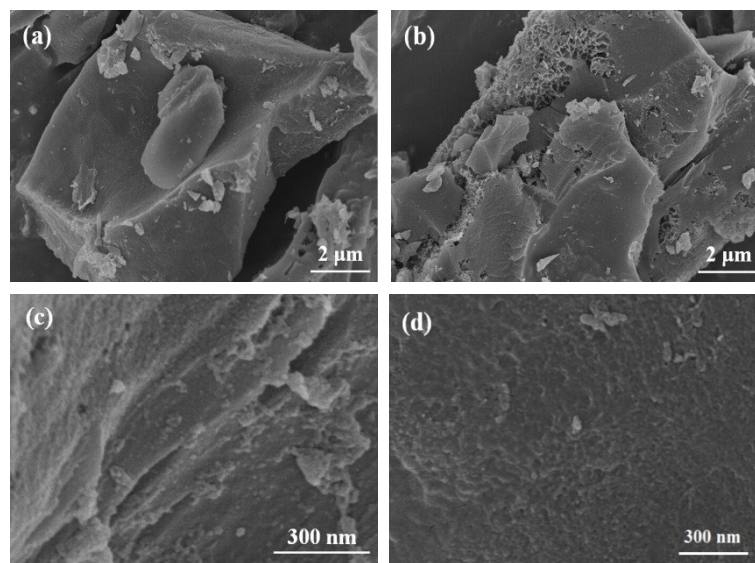

**Fig. S1** Scanning electron microscopy (SEM) images:(a, c) SFHC-1:1, (b, d) SFHC-1:2.
